# Supplementary material for: Dissolved Calcium in Kentucky Lake and Its Watershed: Trends and Possible Sources and Implications for Zebra Mussel Colonization
Source: Preprints.org preprint supplement (doi:10.20944/preprints202310.0535.v1), 2023-10-09
Supplement: Supplementary file 1 [file supplementary]

SUPPLEMENTARY MATERIAL FOR:

**Dissolved Calcium in Kentucky Lake Watershed: Sources, Trends and Possible Implications for Zebra Mussel Colonization**

**Kelsie Meystedt<sup>1</sup>, Bommanna G. Loganathan,<sup>1\*</sup> Susan P. Hendricks,<sup>2</sup> and David S. White<sup>2</sup>**

<sup>1</sup> Department of Chemistry and Watershed Studies Institute, 1201 Jesse D. Jones Hall,  
Murray State University, Murray, KY-42071 USA,

<sup>2</sup> Hancock Biological Station, 561 Emma Drive, Murray State University, Murray, KY 42071, USA

\*Correspondence: [bloganathan@murraystate.edu](mailto:bloganathan@murraystate.edu) (B.G.L); [dwhite@murraystate.edu](mailto:dwhite@murraystate.edu) (D.W.)

Corresponding author at:

(1)

Department of Chemistry, 1201 Jesse D. Jones Hall, Murray State University, Murray, KY 42071, USA.

Phone: 1+ 270-809-3044; Fax: +1-270-809-6474.

(2) Hancock Biological Station, 561 Emma Drive, Murray State University, Murray, KY 42071, USA.

**Submitted to: *Sustainable Chemistry***

**Table S1.**

Table S1. Details of sampling sites used for monitoring dissolved calcium in water samples.

| Station | Name                 | Location                             | Latitude | Longitude | Avg. Depth (m) |
|---------|----------------------|--------------------------------------|----------|-----------|----------------|
| 1N      | Panther Creek 1      | Within Panther Creek embayment       | 36.5209  | -88.0094  | 0              |
| 2L      | Ledbetter 2          | Within Ledbetter Creek embayment     | 36.7503  | -88.1405  | 4.61           |
| 2N      | Panther Creek 2      |                                      | 36.5112  | -87.9886  | 0              |
| 5L      | Ledbetter 5          | 50m downstream from KY HWY 94 bridge | 36.7332  | -88.1507  | 0              |
| CB      | Blood River Light    | Old river channel of KY Lake         | 36.6388  | -88.0573  | 17.02          |
| CH      | Highland Light       | Old river channel of KY Lake         | 36.7397  | -88.1086  | 16.21          |
| CW      | Widow Reynolds Light | Old river channel of KY Lake         | 36.8239  | -88.1371  | 17.45          |
| ET      | Turkey Bay           | East side of KY Lake                 | 36.7357  | -88.0917  | 6.13           |
| UA      | Upper Anderson       | Within Anderson                      | 36.7207  | -88.1177  | 4.10           |

|    |                   |                                    |         |          |       |
|----|-------------------|------------------------------------|---------|----------|-------|
|    |                   | Creek<br>embayment                 |         |          |       |
| UB | Upper Blood River | Within Blood<br>River<br>embayment | 36.6346 | -88.1149 | 4.77  |
| UT | Turkey Bay        | Upper Turkey<br>Bay                | 36.7411 | -88.0889 | 3.00  |
| WA | Anderson Bay      | West side of<br>KY Lake            | 36.7219 | -88.1103 | 5.90  |
| WB | Blood River       | West Side of<br>KY Lake            | 36.6426 | -88.0769 | 10.22 |
| WJ | Jonathan Creek    | West side of<br>KY Lake            | 36.8126 | -88.1550 | 7.91  |
| WL | Ledbetter Creek   | West side of<br>KY Lake            | 36.7575 | -88.1287 | 7.73  |

Table S2a. Dissolved calcium concentrations (mg/L) in water samples collected from Panther Creek (1N, 2N) and Ledbetter (2L and 5L) sites during the years 2018 to 2020.

| Site | 2018 |                 |                    |                    |      |      |      |      |      |                 |                  |      | Yr.  | Stdev |
|------|------|-----------------|--------------------|--------------------|------|------|------|------|------|-----------------|------------------|------|------|-------|
|      | Jan  | Feb             | Mar                | Apr                | May  | Jun  | Jul  | Aug  | Sept | Oct             | Nov              | Dec  | Avg. | n=12  |
| 1N   | 25.6 | 34.0            | 33.6               | 35.4               | 26.0 | NA   | NA   | 30.8 | 15.6 | 18.7            | 22.2             | 22.1 | 26.4 | 6.50  |
| 2N   | 14.5 | 36.8            | 43.3               | 33.7               | 49.7 | 5.0  | 15.4 | 51.4 | 28.4 | 0.6             | 29.9             | 27.4 | 28.0 | 15.8  |
| 2L   | 29.4 | 38.2            | 19.2               | 40.4               | 24.7 | 20.2 | 14.7 | 16   | 13.7 | 17.5            | 20.1             | 21.1 | 22.9 | 8.40  |
| 5L   | <0.2 | 13.4            | 17.3               | <0.2               | <0.2 | <0.2 | 3.7  | <0.2 | 5.6  | 3.8             | 5.8              | 4.6  | 7.74 | 4.98  |
|      |      |                 |                    |                    |      |      |      |      |      |                 |                  |      |      |       |
| 2019 |      |                 |                    |                    |      |      |      |      |      |                 |                  |      |      |       |
|      |      |                 |                    |                    |      |      |      |      |      |                 |                  |      |      |       |
| 1N   | 20.8 | NS <sup>w</sup> | 16.8               | 20.5               | 18.8 | 13.7 | 14.8 | 12.6 | 15.1 | NS <sup>w</sup> | NS <sup>CE</sup> | 15.4 | 16.5 | 2.77  |
| 2N   | 24.8 | NS <sup>w</sup> | 22.3               | 17.6               | 28.1 | 28.8 | 29.2 | 31.1 | 30.9 | NS <sup>w</sup> | 26.5             | 13.7 | 25.3 | 5.52  |
| 2L   | 18.6 | 11.7            | 14.9               | 20                 | 18.1 | 12.9 | 14.3 | 11.8 | 14.2 | 14.7            | 15.4             | 16   | 15.2 | 2.50  |
| 5L   | 3.36 | NS <sup>w</sup> | 3.57               | 3.89               | <0.2 | <0.2 | 3.21 | 1.85 | 4.35 | NS <sup>w</sup> | 8.47             | 3.93 | 4.08 | 1.80  |
|      |      |                 |                    |                    |      |      |      |      |      |                 |                  |      |      |       |
|      |      |                 |                    |                    |      | 2020 |      |      |      |                 |                  |      |      |       |
|      |      |                 |                    |                    |      |      |      |      |      |                 |                  |      |      |       |
| 1N   | 19.2 | 20.5            | NS <sup>c-19</sup> | NS <sup>c-19</sup> | 21.3 | 20.5 | 18.3 | 12.5 | 20.6 | 23.6            | 24.1             | 24.1 | 20.5 | 3.27  |
| 2N   | 25.4 | 23.4            | NS <sup>c-19</sup> | NS <sup>c-19</sup> | 27   | 34.9 | 33.6 | 29.1 | 35.3 | 41.1            | 36.5             | 36.2 | 32.3 | 5.41  |
| 2L   | 16.5 | 17.6            | NS <sup>c-19</sup> | NS <sup>c-19</sup> | 21   | 19.9 | 17.3 | 16.2 | 18   | 21.9            | 21.9             | 23.5 | 19.4 | 2.46  |
| 5L   | <0.2 | 2.05            | NS <sup>c-19</sup> | NS <sup>c-19</sup> | 3.98 | 1.82 | 1.33 | <0.2 | 2.27 | 2.4             | 1.76             | <0.2 | 2.23 | 0.79  |

NS<sup>CE</sup>:Not Sampled- unable to access the sampling site due to Carp Extraction;  
NS<sup>w</sup> = Not Sampled due to Inclement Weather;  
NS<sup>c-19</sup> : Not Sampled due to Covid-19 Cancellation. NA : Sample not available.

Table S2b. Dissolved calcium concentrations (mg/L) in water samples collected from Panther Creek (1N, 2N and PS) and Ledbetter (2L and 5L) sites during the years 2021 and 2022.

| 2021 |                  |                 |                 |       |                 |                  |                  |       |       |                 |      |      | Yr.  | Stdev |
|------|------------------|-----------------|-----------------|-------|-----------------|------------------|------------------|-------|-------|-----------------|------|------|------|-------|
|      | Jan              | Feb             | Mar             | Apr   | May             | Jun              | Jul              | Aug   | Sept  | Oct             | Nov  | Dec  | Avg. | n=12  |
| 1N   | 26.8             | 26.1            | NS <sup>W</sup> | 22.0  | 19.2            | NS <sup>BC</sup> | NS <sup>BC</sup> | 16.5  | 24.0  | NS <sup>W</sup> | 25.1 | 26.6 | 23.3 | 3.77  |
| 2N   | 35.2             | 17.9            | 12.8            | 31.8  | 21.2            | NS <sup>BC</sup> | 37.0             | 26.4  | 41.0  | 40.3            | 39.5 | 37.7 | 31.3 | 8.64  |
| 2L   | NS <sup>CE</sup> | NS <sup>W</sup> | 15.8            | 20.4  | 19.7            | 18.8             | 18.7             | 15.5  | 22.4  | 24.7            | 23.6 | 26.2 | 21.3 | 3.67  |
| 5L   | 0.85             | <0.2            | <0.2            | 1.92  | 1.35            | <0.2             | 1.54             | 0.24  | 1.42  | 4.62            | 3.95 | 5.63 | 2.19 | 1.91  |
| PS   | 44.4             | 38.9            | 40.0            | 41.0  | NS <sup>W</sup> | NS <sup>BC</sup> | 42.0             | 39.2  | 46.9  | 45.4            | 45.2 | 45.0 | 42.8 | 3.19  |
| 2022 |                  |                 |                 |       |                 |                  |                  |       |       |                 |      |      |      |       |
| 1N   | 25.00            | NS <sup>W</sup> | 25.00           | 15.00 | 25.00           | NS               | NS               | 22.88 | 21.06 | 26.8            | NS   | 22.4 | 22.0 | 3.71  |
| 2N   | 27.20            | 11.00           | 9.70            | 4.90  | 35.50           | NS               | NS               | 40.45 | 39.60 | 45.5            | NS   | 37.0 | 27.9 | 14.4  |
| 2L   | 23.80            | 20.10           | 22.90           | 18.90 | 22.60           | NS               | NS               | 23.08 | 19.72 | 23.9            | NS   | 22.0 | 21.9 | 1.87  |
| 5L   | 2.70             | 3.20            | 2.50            | <0.2  | 3.00            | NS               | NS               | 1.32  | <0.2  | 2.46            | NS   | 4.45 | 2.80 | 1.12  |
| PS   | 40.60            | 36.60           | 41.80           | 38.20 | 44.60           | NS               | NS               | NA2   | 42.93 | 47.5            | NS   | NS   | 41.8 | 3.28  |

NS<sup>CE</sup>:Not Sampled- unable to access the sampling site due to Carp Extraction;

NS<sup>W</sup> = Not Sampled due to Inclement Weather; NS- Not sampled.

NS<sup>BC</sup>: Not sampled due to boat complications. PS: Panther Spring- Added sampling site during the years 2021-2022.

Table S3a. Dissolved calcium concentrations in Kentucky Lake water during the year 2018.

| Cruise #                 | C-578   | C-579   | C-580   | C-582   | C-584   | C-586   | C-588   | C-590   | C-592   | C-594    | C-596    | C-597    |                |             |
|--------------------------|---------|---------|---------|---------|---------|---------|---------|---------|---------|----------|----------|----------|----------------|-------------|
| Sample ID                | 1/18/18 | 2/04/18 | 3/20/18 | 4/06/18 | 5/22/18 | 6/24/18 | 7/16/18 | 8/25/18 | 9/16/18 | 10/27/18 | 11/01/18 | 12/03/18 | Yearly<br>mean | Std.<br>Dev |
| <b>Kentucky Lake</b>     |         |         |         |         |         |         |         |         |         |          |          |          |                |             |
| CH-1                     | 28.0    | 38.4    | NS      | 29.4    | 30.0    | 21.1    | 30.9    | 28.5    | 15.6    | 18.8     | 22.1     | 22.4     | 25.9           | 6.54        |
| CH-B                     | 31.2    | 39.5    | NS      | 39.7    | 31.3    | 25.4    | 37.5    | 29.2    | 14.2    | 18.8     | 22.3     | 22.2     | 28.3           | 8.54        |
| CW-1                     | 29.9    | 18.1    | NS      | 40.2    | 28.0    | 17.4    | 5.9     | 24.9    | 15.1    | 18.7     | 22.5     | 22.4     | 22.1           | 8.90        |
| CW-B                     | 28.8    | NS      | NS      | NS      | 29.3    | 20.4    | 10.1    | 29.7    | 15.1    | 18.3     | 22.6     | 22.4     | 21.9           | 6.74        |
| CB-1                     | NS      | 19.2    | NS      | 42.4    | 22.7    | 23.2    | 44.1    | 29.5    | 16.2    | 19.7     | 23.1     | 22.6     | 26.3           | 9.60        |
| CB-B                     | NS      | 20.2    | NS      | 43.8    | 25.8    | 26.6    | NS      | 33.7    | 16.4    | 19.4     | 22.9     | 22.6     | 25.7           | 8.41        |
| ET-1                     | 30.5    | 26.0    | NS      | NS      | 26.0    | 17.3    | 39.0    | 19.4    | 15.3    | 18.7     | 23.1     | 22.9     | 23.8           | 7.09        |
| ET-B                     | NS      | NS      | NS      | 36.5    | NS      | NS      | 41.9    | 17.0    | 15.2    | 18.7     | 23.0     | 22.8     | 25.0           | 10.2        |
| UT-1                     | 30.5    | 24.8    | NS      | 36.5    | 22.9    | 18.6    | 42.2    | 19.0    | 14.6    | 18.4     | 22.9     | 22.1     | 24.8           | 8.41        |
| UA-1                     | 28.5    | 18.9    | NS      | 40.9    | 20.5    | 28.0    | 17.9    | 27.6    | 12.4    | 17.3     | 21.1     | 20.5     | 23.0           | 7.74        |
| WL-1                     | 28.7    | 19.0    | 18.9    | 42.5    | 26.3    | 14.5    | 15.7    | 9.4     | 15.1    | 18.6     | 20.9     | 21.4     | 20.9           | 8.56        |
| WL-B                     | <0.2    | <0.2    | <0.2    | <0.2    | 33.9    | 15.2    | 20.4    | 16.0    | 24.9    | 18.3     | 20.7     | 21.6     | 21.4           | 5.94        |
| WA-1                     | 30.2    | NS      | NS      | 38.6    | 26.2    | 26.6    | 46.1    | 25.6    | 14.0    | 18.0     | 21.6     | 22.0     | 26.9           | 9.53        |
| WA-B                     | NS      | NS      | NS      | NS      | NS      | NS      | 46.0    | NS      | 13.9    | 17.8     | 21.5     | 21.9     | 24.2           | 12.6        |
| WB-1                     | 28.5    | 14.5    | NS      | 34.2    | 17.5    | 24.5    | 41.9    | 16.6    | 13.0    | 17.6     | 18.2     | 18.6     | 22.3           | 9.06        |
| WB-B                     | NS      | NS      | NS      | 21.4    | NS      | 27.9    | NS      | 22.3    | 13.4    | 17.2     | 20.3     | 21.7     | 20.6           | 4.49        |
| WJ-1                     | NS      | 19.7    | NS      | NS      | 23.2    | 34.6    | 21.3    | 25.7    | 14.8    | 18.5     | 22.0     | 22.2     | 22.4           | 5.50        |
| WJ-B                     | NS      | NS      | NS      | NS      | 26.7    | NS      | 13.7    | 27.0    | 14.7    | 18.1     | 21.5     | 22.2     | 20.6           | 5.32        |
| Total Monthly<br>average | 29.5    | 23.5    | 18.9    | 37.2    | 26.0    | 22.7    | 29.7    | 23.6    | 15.2    | 18.4     | 21.8     | 21.9     | -              | -           |

NS = Not Sampled

Table S3b. Dissolved calcium concentrations in Kentucky Lake water during the year 2019.

| Cruise #                 | C-598   | C-599   | C-600   | C-602   | C-604   | C-606   | C-608   | C-610   | C-612   | C-613    | C-614    | C-616    | Site<br>mean | Std.<br>Dev |
|--------------------------|---------|---------|---------|---------|---------|---------|---------|---------|---------|----------|----------|----------|--------------|-------------|
| Sample ID                | 1/18/19 | 2/00/19 | 3/00/19 | 4/00/19 | 5/00/19 | 6/00/19 | 7/00/19 | 8/00/19 | 9/00/19 | 10/00/19 | 11/00/19 | 12/00/19 |              |             |
| <b>Kentucky Lake</b>     |         |         |         |         |         |         |         |         |         |          |          |          |              |             |
| CH-1                     | 20.5    | 21.0    | 18.3    | 22.1    | 18.2    | 13.5    | 14.5    | 14.0    | 15.4    | 15.1     | 17.6     | 17.9     | 17.3         | 2.86        |
| CH-B                     | 20.4    | 20.0    | 18.2    | 21.8    | 18.5    | 13.4    | 14.5    | 13.6    | 15.0    | 14.9     | 17.7     | 18.1     | 17.2         | 2.83        |
| CW-1                     | 21.5    | WE      | 19.2    | 22.5    | 18.6    | 13.4    | 14.7    | 13.6    | 14.9    | 14.9     | 17.8     | 18.3     | 17.2         | 3.13        |
| CW-B                     | 21.3    | WE      | 18.8    | WE      | 17.7    | 13.1    | 14.6    | 13.2    | 14.7    | 15.0     | 17.8     | 18.3     | 16.4         | 2.71        |
| CB-1                     | 21.5    | WE      | 19.2    | 22.1    | 20.3    | 14.1    | 15.1    | 14.4    | 15.8    | 15.6     | 18.3     | 18.4     | 17.7         | 2.86        |
| CB-B                     | 21.4    | WE      | 19.4    | 21.9    | 18.2    | 14.2    | 15.3    | 14.1    | 15.3    | 15.4     | 18.3     | 18.3     | 17.4         | 2.74        |
| ET-1                     | 23.1    | WE      | 18.9    | 22.1    | 18.5    | 13.4    | 14.4    | 13.3    | 14.7    | 15.3     | 18.1     | 18.5     | 17.3         | 3.35        |
| ET-B                     | 23.0    | WE      | 18.8    | 22.3    | 18.5    | 12.8    | 14.3    | 13.9    | 14.8    | 15.4     | 17.9     | 18.0     | 17.2         | 3.34        |
| UT-1                     | 21.2    | WE      | 17.6    | 21.0    | 18.4    | 12.5    | 13.8    | 13.1    | 14.7    | 14.5     | 17.8     | 17.7     | 16.6         | 3.04        |
| UT-B                     | NS       | NS       | 17.4     | 17.3         | -           |
| UA-1                     | 16.7    | 11.0    | 13.4    | 19.0    | 17.9    | 11.9    | 14.0    | 12.1    | 13.6    | 14.8     | 17.0     | 15.8     | 14.8         | 2.54        |
| UA-B                     | NS       | NS       | 15.8     | 15.8         | -           |
| WA-1                     | 16.9    | 13.7    | 12.6    | 18.9    | 17.9    | 12.5    | 14.1    | 12.9    | 14.3    | 15.2     | 17.1     | 17.5     | 15.3         | 2.26        |
| WA-B                     | 21.5    | 12.7    | 12.2    | 19.4    | 17.8    | 12.8    | 14.1    | 12.4    | 14.3    | 14.9     | 17.0     | 17.4     | 15.5         | 3.04        |
| WL-1                     | 17.8    | 12.7    | 29.0    | 20.2    | 18.3    | 12.8    | 14.5    | 13.2    | NS      | NS       | NS       | 13.4     | 16.9         | 5.32        |
| WL-B                     | 17.8    | 12.2    | 14.2    | 20.2    | 18.4    | 12.7    | 14.5    | 13.0    | NS      | NS       | NS       | NS       | 15.4         | 3.02        |
| WJ-1                     | 19.4    | 16.1    | 14.6    | 19.5    | 17.0    | 12.8    | 14.5    | 12.9    | NS      | NS       | NS       | NS       | 15.8         | 2.63        |
| WJ-B                     | 17.9    | 16.1    | 13.9    | NS      | 18.2    | 13.1    | 14.5    | 11.7    | NS      | NS       | NS       | NS       | 15.2         | 2.48        |
| Total Monthly<br>average | 19.5    | 15.1    | 16.6    | 20.5    | 18.0    | 13.0    | 14.4    | 13.1    | 14.8    | 15.1     | 17.7     | 17.4     | -            | -           |

WE: Inclement weather cancellation.

NS = Not Sampled

Table S3c. Dissolved calcium concentrations in Kentucky Lake water during the year 2020.

| Cruise #              | C-617   | C-618   | C-NS    | C-NS    | C-620   | C-622   | C-624   | C-626   | C-627   | C-629    | C-631    | C-632   |           |          |
|-----------------------|---------|---------|---------|---------|---------|---------|---------|---------|---------|----------|----------|---------|-----------|----------|
| Sample ID             | 1/31/20 | 2/28/20 | 3/00/20 | 4/00/20 | 5/27/20 | 6/30/20 | 7/30/20 | 8/31/20 | 9/16/20 | 10/20/20 | 11/18/20 | 12/8/20 | Site mean | Std. Dev |
| <b>Kentucky Lake</b>  |         |         |         |         |         |         |         |         |         |          |          |         |           |          |
| CH-1                  | 20.0    | 21.2    | Covid   | Covid   | 22.1    | 19.8    | 17.7    | 11.5    | 20.7    | 23.1     | 23.9     | 23.4    | 20.3      | 3.43     |
| CH-B                  | 19.6    | 20.3    | Covid   | Covid   | 21.9    | 20.2    | 18.3    | 11.3    | 20.5    | 23.6     | 23.8     | 23.4    | 20.4      | 3.33     |
| CW-1                  | 20.3    | 21.2    | Covid   | Covid   | 21.6    | NS      | 17.3    | 20.6    | 20.6    | 22.9     | 23.9     | 23.1    | 20.5      | 2.52     |
| CW-B                  | 20.1    | 21.4    | Covid   | Covid   | 21.3    | NS      | 18.0    | 20.5    | 21.3    | 22.8     | 24.3     | 23.1    | 20.7      | 2.48     |
| CB-1                  | 19.9    | 21.1    | Covid   | Covid   | 22.4    | 19.9    | 18.5    | 20.5    | 20.5    | 22.9     | WE       | 23.6    | 20.8      | 2.40     |
| CB-B                  | 20.3    | 21.1    | Covid   | Covid   | 22.0    | 20.2    | 18.6    | 20.1    | 20.1    | 23.1     | WE       | 23.6    | 20.6      | 2.24     |
| ET-1                  | 20.6    | 21.5    | Covid   | Covid   | 21.3    | 19.5    | 17.5    | 20.8    | 20.8    | 23.0     | 24.0     | 22.7    | 20.9      | 2.65     |
| ET-B                  | 20.5    | 21.7    | Covid   | Covid   | 20.8    | 19.5    | 17.3    | 20.6    | 20.6    | 22.4     | 23.9     | 22.8    | 20.7      | 2.50     |
| UT-1                  | 20.3    | 21.8    | Covid   | Covid   | 21.4    | 18.7    | 17.0    | 20.6    | 20.6    | 22.7     | 24.5     | 23.0    | 20.7      | 2.58     |
| UT-B                  | 19.9    | 21.2    | Covid   | Covid   | 21.0    | 19.1    | 17.1    | 19.9    | 19.9    | 22.0     | 23.7     | 22.8    | 20.5      | 2.39     |
| UA-1                  | 16.4    | 17.4    | Covid   | Covid   | 20.2    | 19.4    | 16.3    | 18.1    | 18.1    | 22.0     | 23.2     | 22.5    | 19.2      | 2.54     |
| UA-B                  | 16.2    | 17.5    | Covid   | Covid   | 20.2    | 19.4    | 16.8    | 17.7    | 17.7    | 21.8     | 23.3     | 22.5    | 19.0      | 2.45     |
| WA-1                  | 17.4    | 18.2    | Covid   | Covid   | 21.8    | 19.5    | 16.6    | 16.4    | 18.7    | 22.1     | 24.3     | 23.1    | 19.7      | 2.84     |
| WA-B                  | 17.3    | 18.4    | Covid   | Covid   | 21.6    | 19.6    | 16.4    | 16.4    | 19.2    | 21.7     | 23.8     | 22.9    | 19.6      | 2.83     |
| Total Monthly average | 19.2    | 20.3    | -       | -       | 21.4    | 19.6    | 17.4    | 18.2    | 20.0    | 22.6     | 23.9     | 23.0    | -         | -        |

NS = Not Sampled   WE = Inclement weather cancellation.   Covid = COVID-19 cancellation

Table S3d. Dissolved calcium concentrations in Kentucky Lake water during the year 2021.

| Cruise #                 | C-633   | C-634   | C-635   | C-637   | C-638   | C-640   | C-642   | C-644   | C-646   | C-648    | C-650    | C-651    | Site<br>mean | Std.<br>Dev |
|--------------------------|---------|---------|---------|---------|---------|---------|---------|---------|---------|----------|----------|----------|--------------|-------------|
| Sample ID                | 1/22/21 | 2/23/21 | 3/31/21 | 4/28/21 | 5/14/21 | 6/03/21 | 7/17/21 | 8/24/21 | 9/30/21 | 10/21/21 | 11/22/21 | 12/08/21 |              |             |
| <b>Kentucky Lake</b>     |         |         |         |         |         |         |         |         |         |          |          |          |              |             |
| CH-1                     | WE      | 27.4    | 21.2    | 20.4    | 20.4    | 20.9    | 20.2    | 16.9    | 25.7    | 25.1     | 25.0     | 27.0     | 22.7         | 3.25        |
| CH-B                     | WE      | 26.6    | 20.6    | 20.9    | 19.8    | 21.3    | 19.9    | 16.9    | 25.8    | 25.1     | 24.9     | 26.8     | 22.6         | 3.18        |
| CW-1                     | 26.8    | 26.2    | 20.6    | 20.6    | 19.7    | 21.3    | 19.7    | 18.1    | 26.1    | 25.0     | 24.9     | 27.4     | 23.0         | 3.18        |
| CW-B                     | 27.2    | 27.0    | 20.7    | 20.7    | 19.5    | 21.3    | 19.4    | 18.1    | 25.9    | 25.1     | 24.7     | 27.4     | 23.1         | 3.31        |
| CB-1                     | 27.3    | 26.4    | 20.8    | 22.0    | 20.7    | 22.3    | 21.1    | 19.6    | 25.2    | 25.0     | 24.9     | 27.4     | 23.6         | 2.65        |
| CB-B                     | 27.3    | 26.4    | 20.8    | 21.7    | 20.7    | 22.1    | 21.0    | 20.1    | 25.2    | 24.9     | 25.0     | 27.4     | 23.6         | 2.63        |
| ET-1                     | 26.3    | 25.8    | 18.9    | 21.0    | 20.0    | 20.9    | 20.2    | 19.4    | 26.1    | 25.0     | 24.8     | 27.2     | 23.0         | 3.00        |
| ET-B                     | 26.5    | 25.8    | 19.2    | 21.1    | 19.9    | 20.8    | 19.5    | 20.2    | 25.7    | 24.9     | 24.7     | 27.2     | 23.0         | 2.95        |
| UT-1                     | 25.8    | 25.2    | 18.3    | 20.6    | 19.7    | 20.5    | 19.3    | 19.2    | 25.8    | 24.8     | 24.6     | 26.8     | 22.6         | 3.05        |
| UT-B                     | 25.5    | 25.9    | 18.1    | 20.7    | 19.7    | 20.5    | 19.3    | 19.0    | 25.8    | 24.4     | 24.4     | 26.7     | 22.5         | 3.07        |
| UA-1                     | 25.0    | CARP    | 14.5    | 19.8    | 20.1    | 20.1    | 18.6    | 17.0    | 22.9    | 24.3     | 23.9     | 25.8     | 21.1         | 3.43        |
| UA-B                     | 24.6    | CARP    | 14.2    | 20.3    | 19.8    | 20.2    | 18.5    | 17.5    | 23.1    | 24.2     | 23.7     | 25.8     | 21.1         | 3.37        |
| WA-1                     | 24.9    | 24.6    | 16.1    | 20.5    | 19.7    | 20.3    | 19.1    | 16.7    | 23.9    | 24.3     | 24.3     | 26.6     | 21.8         | 3.31        |
| WA-B                     | 24.6    | 24.8    | 16.2    | 20.5    | 19.8    | 19.2    | 19.0    | 17.6    | 23.7    | 24.3     | 24.2     | 27.0     | 21.7         | 3.27        |
| Total Monthly<br>average | 26.0    | 26.0    | 18.6    | 20.8    | 20.0    | 20.8    | 19.6    | 18.3    | 25.0    | 24.7     | 24.6     | 26.9     | -            | -           |

NS = Not Sampled   WE= Inclement weather cancellation   CARP = Unable to access sampling site due to Asian Carp Extraction.

Table S3e. Dissolved calcium concentrations in Kentucky Lake water during the year 2022.

| Cruise #                    | C-652   | C-653   | C-654   | C-655   | C-656   | C-658   | C-660   | C-662   | C-663   | C-665   | C-667    | C670     |           |          |
|-----------------------------|---------|---------|---------|---------|---------|---------|---------|---------|---------|---------|----------|----------|-----------|----------|
| Sample ID                   | 1/27/22 | 2/26/22 | 4/01/22 | 4/15/22 | 5/17/22 | 6/--/22 | 7/--/22 | 8/04/22 | 8/23/22 | 9/22/22 | 10/26/22 | 12/27/22 | Site mean | Std. Dev |
| <b>Kentucky Lake</b>        |         |         |         |         |         |         |         |         |         |         |          |          |           |          |
| CH-1                        | 25.8    | 21.0    | 27.7    | 24.7    | 23.0    | NS      | NS      | 22.1    | 23.7    | 21.7    | 25.8     | 24.4     | 24.0      | 2.00     |
| CH-B                        | 25.9    | WE      | 27.5    | 25.0    | 23.7    | NS      | NS      | 22.1    | 22.5    | 20.7    | 26.9     | NS       | 24.3      | 2.28     |
| CW-1                        | 25.8    | 21.0    | 27.4    | 24.2    | 23.3    | NS      | NS      | 21.5    | 22.7    | 20.5    | 25.7     | 23.8     | 23.6      | 2.14     |
| CW-B                        | 26.1    | WE      | 27.2    | 24.1    | 23.2    | NS      | NS      | 21.6    | 22.8    | 21.4    | 25.0     | NS       | 23.9      | 1.94     |
| CB-1                        | 25.8    | 20.6    | 27.7    | 25.3    | 24.0    | NS      | NS      | 21.9    | 22.1    | 20.9    | 27.3     | 23.6     | 23.9      | 2.42     |
| CB-B                        | 26.0    | WE      | 27.6    | 25.9    | 23.3    | NS      | NS      | 21.6    | 23.0    | 22.0    | 28.1     | NS       | 24.7      | 2.37     |
| ET-1                        | 26.3    | 23.1    | 27.7    | 23.8    | 24.0    | NS      | NS      | NS      | 22.0    | 20.4    | 26.5     | 22.0     | 24.0      | 2.29     |
| ET-B                        | 26.4    | 23.3    | 27.6    | 24.5    | 23.7    | NS      | NS      | NS      | 22.2    | 20.6    | 25.8     | NS       | 24.3      | 2.15     |
| UT-1                        | 25.7    | 22.7    | 24.7    | 23.1    | 23.8    | NS      | NS      | 21.4    | 22.1    | 20.3    | 25.7     | 23.8     | 23.3      | 1.69     |
| UT-B                        | 25.8    | 22.9    | 23.8    | 21.0    | 24.1    | NS      | NS      | 21.6    | 21.7    | 20.4    | 26.6     | NS       | 23.1      | 2.03     |
| UA-1                        | 23.0    | 20.2    | 22.2    | 20.8    | 22.8    | NS      | NS      | 21.1    | 22.3    | 19.6    | 25.5     | 21.9     | 21.9      | 1.59     |
| UA-B                        | 22.9    | 20.0    | 21.9    | 19.3    | 22.6    | NS      | NS      | NS      | 22.4    | 19.1    | 24.8     | NS       | 21.6      | 1.86     |
| WA-1                        | 22.7    | 21.2    | 23.7    | 21.6    | 23.0    | NS      | NS      | 21.2    | 21.8    | 20.5    | 25.2     | 22.1     | 22.3      | 1.32     |
| WA-B                        | 22.7    | 21.4    | 23.1    | 21.7    | 23.2    | NS      | NS      | 21.1    | 21.8    | 19.7    | 24.8     | NS       | 22.2      | 1.39     |
| Total<br>Monthly<br>average | 25.1    | 21.6    | 25.7    | 23.2    | 23.4    | -       | -       | 21.6    | 22.3    | 20.5    | 25.9     | 23.1     | 23.4      | 1.96     |

\*NS = Not Sampled    \*WE= Inclement weather cancellation

Table S4. Dissolved calcium concentrations (mg/L) in water samples collected from the Ohio River at Paducah (KY) and Brookport (IL) sites during the years 2018 to 2020.

| Site | 2018            |                 |                    |                    |      |                 |      |      |      |                 |      |      |       |       |
|------|-----------------|-----------------|--------------------|--------------------|------|-----------------|------|------|------|-----------------|------|------|-------|-------|
|      | Jan             | Feb             | Mar                | Apr                | May  | Jun             | Jul  | Aug  | Sept | Oct             | Nov  | Dec  | Avg.  | Stdev |
| OH-P | 16.6            | 20.7            | NS                 | 31.9               | 32.1 | 32.9            | 37.6 | 29.8 | 14.5 | 68.9            | 22.5 | 22.9 | 30.04 | 14.1  |
| OH-B | 31.1            | 37.4            | 54.1               | 38.5               | 44.2 | 51.8            | 59.6 | 62.2 | 30.4 | 83.2            | 33.8 | 27.5 | 46.15 | 16.4  |
|      |                 |                 |                    |                    |      |                 |      |      |      |                 |      |      |       |       |
| 2019 |                 |                 |                    |                    |      |                 |      |      |      |                 |      |      |       |       |
| OH-P | 19.9            | NS <sup>w</sup> | NS <sup>w</sup>    | 22.5               | 21.2 | NS <sup>w</sup> | 14.7 | 12.8 | 13.7 | NS <sup>w</sup> | 16.3 | 17.0 | 17.3  | 3.36  |
| OH-B | 34.9            | NS <sup>w</sup> | NS <sup>w</sup>    | 41.5               | 36.4 | NS <sup>w</sup> | 30.6 | 26.9 | 27.1 | NS <sup>w</sup> | 33.5 | 28.2 | 32.4  | 4.82  |
|      |                 |                 |                    |                    |      |                 |      |      |      |                 |      |      |       |       |
| 2020 |                 |                 |                    |                    |      |                 |      |      |      |                 |      |      |       |       |
| OH-P | NS <sup>w</sup> | NS <sup>w</sup> | NS <sup>c-19</sup> | NS <sup>c-19</sup> | 26.3 | 17.3            | 19   | 10.7 | 19.3 | 23.5            | 26   | 25.5 | 21.0  | 5.08  |
| OH-B | NS <sup>w</sup> | NS <sup>w</sup> | NS <sup>c-19</sup> | NS <sup>c-19</sup> | 33.1 | 34.4            | 31.3 | 29.2 | 32.1 | 39.7            | 39.5 | 37.1 | 34.6  | 3.62  |
|      |                 |                 |                    |                    |      |                 |      |      |      |                 |      |      |       |       |
| 2021 |                 |                 |                    |                    |      |                 |      |      |      |                 |      |      |       |       |
| OH-P | 27.2            | 25.4            | NS <sup>w</sup>    | NS <sup>w</sup>    | 23.9 | 22.8            | 20.4 | 21.8 | 19.5 | 26.5            | 26.2 | 3.02 | 24.4  | 3.16  |
| OH-B | 39.7            | 40.9            | NS <sup>w</sup>    | NS <sup>w</sup>    | 39.5 | 37.8            | 36.6 | 37.4 | 40.2 | 45.3            | 44.8 | 45.8 | 40.8  | 3.2   |
|      |                 |                 |                    |                    |      |                 |      |      |      |                 |      |      |       |       |
| 2022 |                 |                 |                    |                    |      |                 |      |      |      |                 |      |      |       |       |
| OH-P | 25.5            | 24.6            | 28.5               | 24.4               | 23.5 | -               | -    | -    | -    | -               | -    | -    | 25.3  | 1.72  |
| OH-B | 37.8            | 35.8            | 41.3               | 37.4               | 36.8 | -               | -    | -    | -    | -               | -    | -    | 37.8  | 1.87  |
|      |                 |                 |                    |                    |      |                 |      |      |      |                 |      |      |       |       |

NS<sup>w</sup> : Not sampled due to inclement weather; NS<sup>c-19</sup> : Not sampled due to COVID-19 restrictions.
