# Supplementary material for: Dissolved Calcium in Kentucky Lake and Its Watershed: Trends and Possible Sources and Implications for Zebra Mussel Colonization
Source: Preprints.org preprint supplement (doi:10.20944/preprints202310.0535.v1), 2023-10-09
Supplement: Supplementary file 3 [file supplementary]

Archive with 2 entries (2 files):
- Sustainable Chemistry-Manuscript SubmittedR.pdf
- SustainChem-Ms-Calcium Supplementary Material-Submitted.pdf
